# Supplementary material for: Urinary Arsenic Species are Detectable in Urban Underserved Hispanic/Latino Populations: A Pilot Study from the Study of Latinos: Nutrition & Physical Activity Assessment Study (SOLNAS)
Source: MDPI journal article supplement (doi:10.3390/ijerph17072247), 2020-03-27
Supplement: s1 [file s1]

**Table S1.** Unadjusted Urine Arsenic levels (inorganic and methylated) by subgroups in SOLNAS <sup>a</sup>.

|                   | <b>Median(IQRs)</b> |
|-------------------|---------------------|
| Overall(n=45)     | 9.1(5.5,18.5)       |
| Site              |                     |
| Bronx(n=11)       | 16.3(10.2,19.8)     |
| Chicago(n=11)     | 8.1(5.9,17.5)       |
| Miami(n=11)       | 10.0(6.0,20.0)      |
| San Diego(n=12)   | 7.2(3.0,10.4)       |
| Ethnicity         |                     |
| Caribbean(n=26)   | 12.8(6.4,19.5)      |
| Mainland(n=19)    | 8.7(4.0,16.3)       |
| Obesity status    |                     |
| Non-obese(n=32)   | 8.2(5.5,17.3)       |
| Obese(n=13)       | 16.3(8.9,18.7)      |
| Daily rice intake |                     |
| Low(n=22)         | 9.3(4.7,16.8)       |
| High(n=23)        | 9.1(6.6,19.9)       |
| Folate biomarker  |                     |
| Low(n=23)         | 16.6(7.1,19.9)      |
| High(n=22)        | 7.5(5.0,13.8)       |

<sup>a</sup> Arsenic not derived from seafood estimated using sum of inorganic and methylated arsenic species applying a residual-based method to remove the impact of seafood arsenicals using urine arsenobetaine, a seafood arsenical that correlates with other seafood arsenicals (previously validated in Jones et al. Am J Epidemiol 2016).

**Table 2.** Mean, median, range of absolute change in urinary arsenic (As) species for each analyte by visit <sup>a</sup> among 20 subjects with repeated measurements in select cohort of Hispanic Community Health Study/Study of Latinos (HCHS/SOL).

|                                                     | <b>SOLNAS Visit</b> | <b>Mean (SD)</b> | <b>Median (IQR)</b>  | <b>Minimum</b> | <b>Max</b> |
|-----------------------------------------------------|---------------------|------------------|----------------------|----------------|------------|
| $\Sigma$ As*, $\mu$ g/L                             | 2 vs 1              | -1.97 (4.97)     | -1.92 (-3.46, -0.58) | -12.21         | 11.66      |
|                                                     | 3 vs 1              | 0.49 (6.88)      | -0.79 (-4.84, 5.16)  | -10.74         | 15.42      |
| <b>Inorganic As (iAs), <math>\mu</math>g/L</b>      | 2 vs 1              | -0.18 (0.73)     | -0.10 (-0.30, -0.04) | -2.45          | 1.32       |
|                                                     | 3 vs 1              | 0.22 (1.01)      | 0.05 (-0.28, 0.50)   | -2.21          | 3.05       |
| <b>Monomethylated As (MMA), <math>\mu</math>g/L</b> | 2 vs 1              | -0.46 (1.22)     | -0.28 (-0.91, -0.12) | -4.17          | 2.94       |
|                                                     | 3 vs 1              | 0.20 (1.53)      | -0.02 (-0.68, 0.97)  | -3.47          | 3.23       |
| <b>Dimethylated As (DMA), <math>\mu</math>g/L</b>   | 2 vs 1              | -4.73 (8.32)     | -3.75 (-5.73, 0.03)  | -27.50         | 9.83       |
|                                                     | 3 vs 1              | -1.52 (9.97)     | -1.64 (-6.53, 3.90)  | -20.93         | 15.81      |
| <b>iAs %</b>                                        | 2 vs 1              | 0.03 (5.03)      | 0.33 (-2.66, 1.85)   | -8.61          | 14.76      |
|                                                     | 3 vs 1              | 0.95 (3.04)      | 0.93 (-0.81, 2.33)   | -5.33          | 9.07       |
| <b>MMA%</b>                                         | 2 vs 1              | -0.02 (3.69)     | -0.12 (-2.49, 1.71)  | -6.73          | 7.86       |
|                                                     | 3 vs 1              | 0.90 (3.74)      | 0.44 (-1.03, 4.25)   | -6.95          | 7.98       |
| <b>DMA%</b>                                         | 2 vs 1              | -0.35 (6.73)     | 0.18 (-4.72, 3.51)   | -13.76         | 12.32      |
|                                                     | 3 vs 1              | -1.91 (5.66)     | -1.32 (-5.48, 1.57)  | -12.92         | 8.71       |

<sup>a</sup> SOLNAS visits correspond to 1<sup>st</sup> visit for SOLNAS Ancillary Study, second visit (6-12 days later) and third visit (6-12 months later). \*Arsenic not derived from seafood ( $\Sigma$ As) estimated using sum of inorganic and methylated arsenic species applying a residual-based method to remove the impact of seafood arsenicals using urine arsenobetaine, a seafood arsenical that correlates with other seafood arsenicals (previously validated in Jones et al. Am J Epidemiol 2016).

**Table 3.** Comparison of median (IQR) of urinary arsenic (As) species for each analyte in select cohort of Hispanic Community Health Study/Study of Latinos (HCHS/SOL) and Hispanic/Latino participants in the MESA study<sup>1</sup>.

| Urine arsenic measures, µg/L    | HCHS/SOL (n=45)<br>Median (IQR) | MESA Hispanic/Latinos (n=75)<br>Median (IQR) |
|---------------------------------|---------------------------------|----------------------------------------------|
| ΣAs                             | 6.0 (4.3, 10.5)                 | 3.9 (2.4, 6.2)                               |
| Inorganic As (iAs)              | 0.6 (0.4, 1.0)                  | 0.1 (0.1, 0.4)                               |
| Monomethylarsonic acid<br>(MMA) | 1.2 (0.7, 1.9)                  | 0.4 (0.2, 0.6)                               |
| Dimethylarsinic acid (DMA)      | 7.2 (4.3, 15.3)                 | 3.1 (2.1, 5.3)                               |

ΣAs: sum of inorganic and methylated arsenic species. <sup>1</sup> Jones, M.R., et al., Ethnic, geographic and dietary differences in arsenic exposure in the multi-ethnic study of atherosclerosis (MESA). J Expo Sci Environ Epidemiol, 2018.
